# Supplementary material
Source: bioRxiv or medRxiv preprint supplement (https://medrxiv.org/highwire/filestream/81562/field_highwire_adjunct_files/1/2020.05.15.20101097-2.pdf)
Supplement: Supplementary file [file 2020.05.15.20101097-2.pdf]

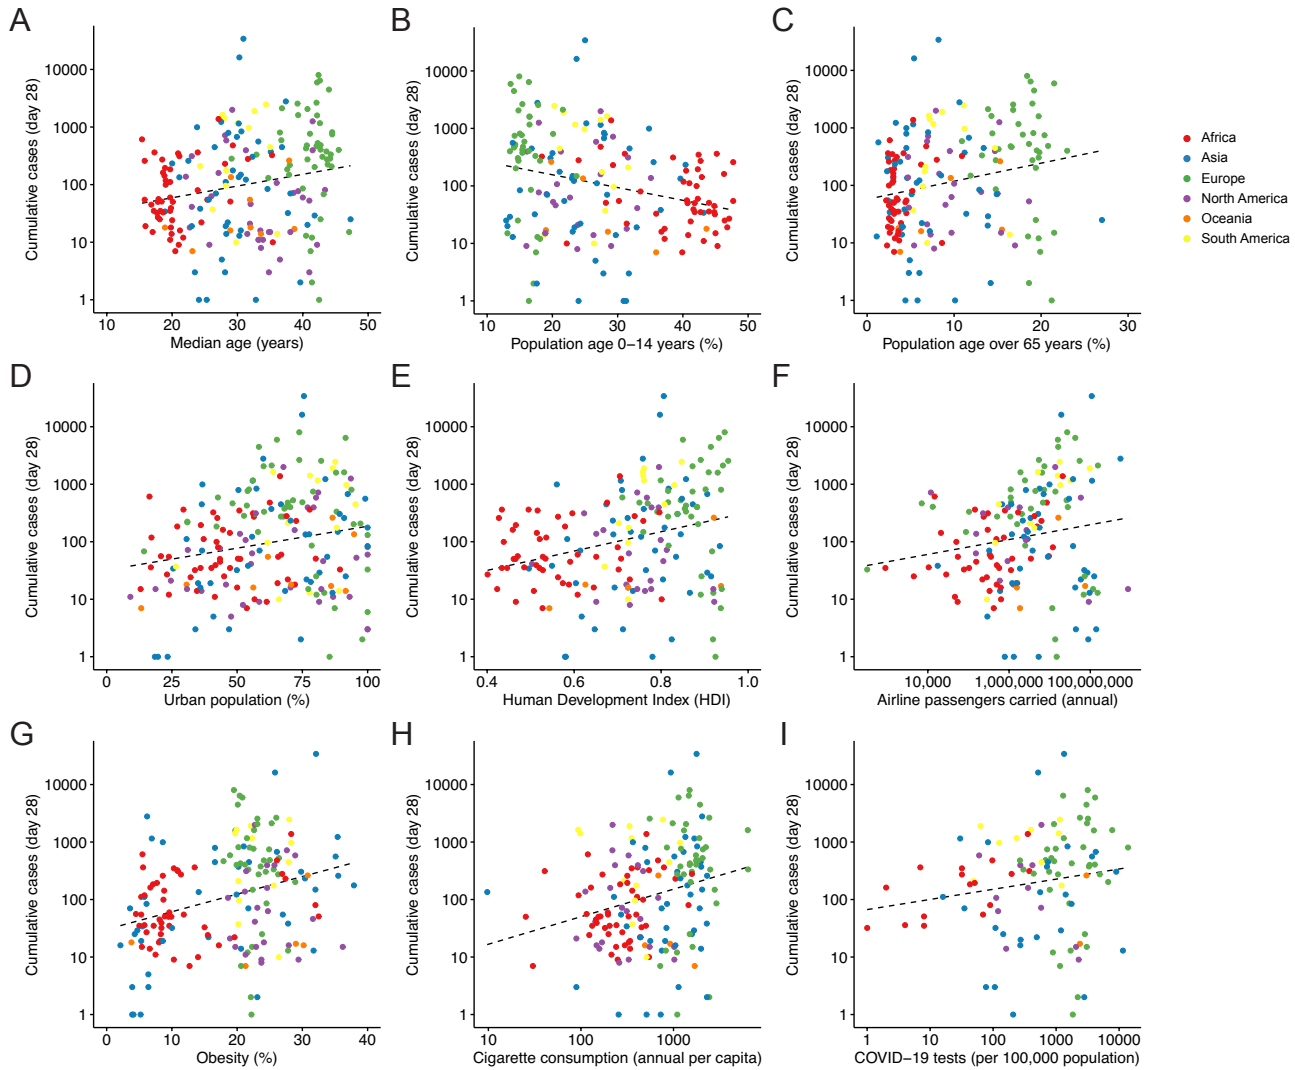

**Supplementary Figure 2. COVID-19 cases in relation to demographic and health factors.**

(A-I) Cumulative COVID-19 cases by country at 28 days since first reported case in relation to (A) median age, (B) percentage of population aged 0-14 years, (C) percentage of population aged over 65 years, (D) percent of urban population, (E) human development index (HDI), (F) airline travelers per annum, (G) obesity prevalence, (H) cigarette consumption (annual per capita), and (I) COVID-19 tests performed (per 100,000 population). A regression line is fit using a linear model (dashed). Each country is colored by continent.
